# Supplementary material for: RASSF4 controls SOCE and ER–PM junctions through regulation of PI(4,5)P2
Source: PubMed Central journal article supplement — J Cell Biol. 2017 Jul 3;216(7):2011–25. doi: 10.1083/jcb.201606047 (PMC5496610; doi:10.1083/jcb.201606047), 2017-07-03
Supplement: JCB_201606047_sm.pdf [file JCB_201606047_sm.pdf]

Chen et al., <https://doi.org/10.1083/jcb.201606047>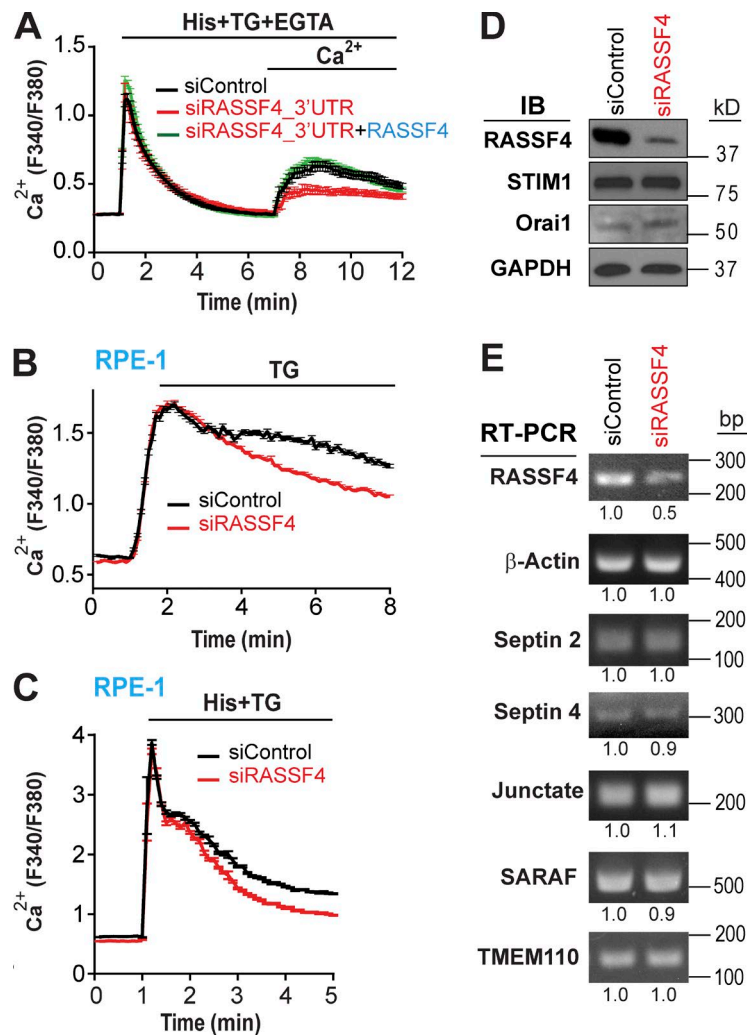

Figure S1. **RASSF4 regulates SOCE.** (A) Fura-2 ratios of HeLa cells treated with siControl and a control vector, siRASSF4\_3'UTR (3' untranslated region) and a control vector, or siRASSF4\_3'UTR and RASSF4-YFP. Cells were stimulated as described in Fig. 1 C. Shown are mean Fura-2 ratios  $\pm$  SEM derived from >1,000 cells for each condition across three independent experiments. (B) Fura-2 ratios of RPE-1 cells treated with siControl and with siRASSF4 and stimulated by 1  $\mu$ M TG. Shown are mean Fura-2 ratios  $\pm$  SEM derived from >1,000 cells for each condition across two independent experiments. (C) Fura-2 ratios of RPE-1 cells treated with siControl and with siRASSF4 and stimulated by 1  $\mu$ M TG and 100  $\mu$ M histamine (His). Shown are mean Fura-2 ratios  $\pm$  SEM derived from >1,000 cells for each condition across two independent experiments. (D) Immunoblot (IB) analyses of the levels of the indicated proteins in HeLa cells treated with siControl or siRASSF4. (E) RT-PCR analyses of the expression levels of the indicated genes in HeLa cells treated with siControl or siRASSF4.

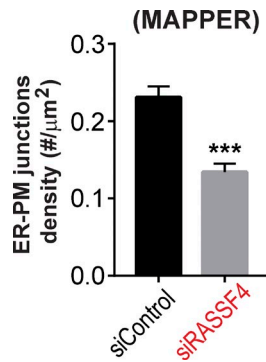

Figure S2. **RASSF4 regulates the formation of ER-PM junctions.** Densities of ER-PM junctions determined using TIRFM imaging of HeLa cells transfected with MAPPER. At least 30 cells treated with siRASSF4 or siControl for each condition from three independent experiments were analyzed. Means  $\pm$  SEM are plotted. \*\*\*,  $P < 0.001$ .

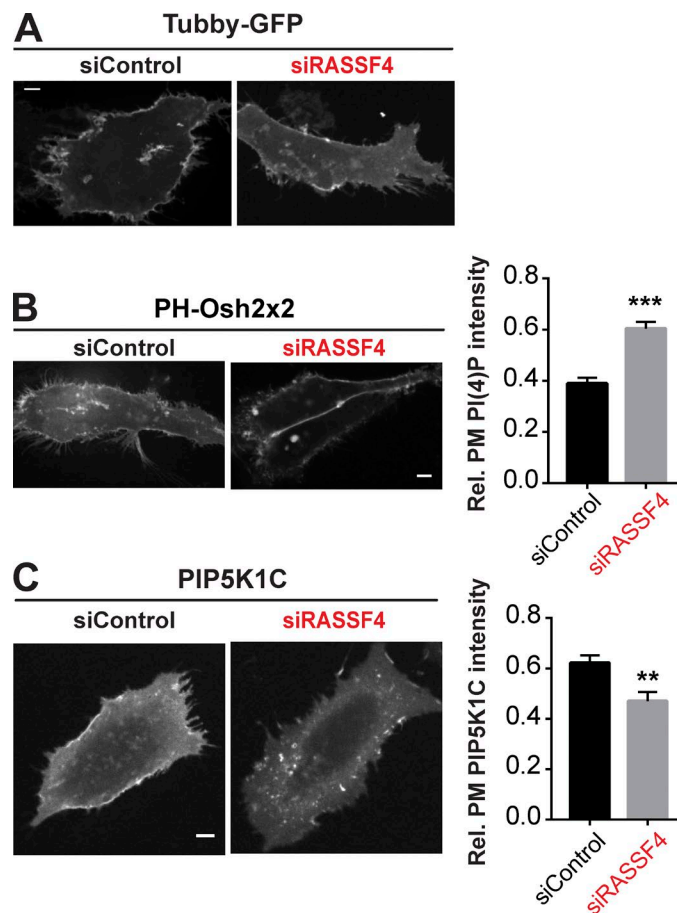

Figure S3. **RASSF4 regulates PM PI(4,5)P<sub>2</sub>, PI(4)P, and PIP5K levels.** (A) Confocal images of HeLa cells cotransfected with Tubby-GFP and either siRASSF4 or siControl. (B) Confocal images of HeLa cells expressing GFP-PH-Osh2x2 and treated with either siRASSF4 or siControl. Relative (Rel.) GFP-PH-Osh2x2 fluorescence intensity in the PM from >60 cells across four independent experiments was evaluated. Means  $\pm$  SEM are shown. (C) Confocal images of HeLa cells expressing YFP-PIP5K1C and treated with either siRASSF4 or siControl. Relative YFP-PIP5K1C fluorescence intensity in the PM from >30 cells across two independent experiments was evaluated. Means  $\pm$  SEM are shown. \*\*,  $P < 0.01$ ; \*\*\*,  $P < 0.001$ . Bars, 5  $\mu$ m.

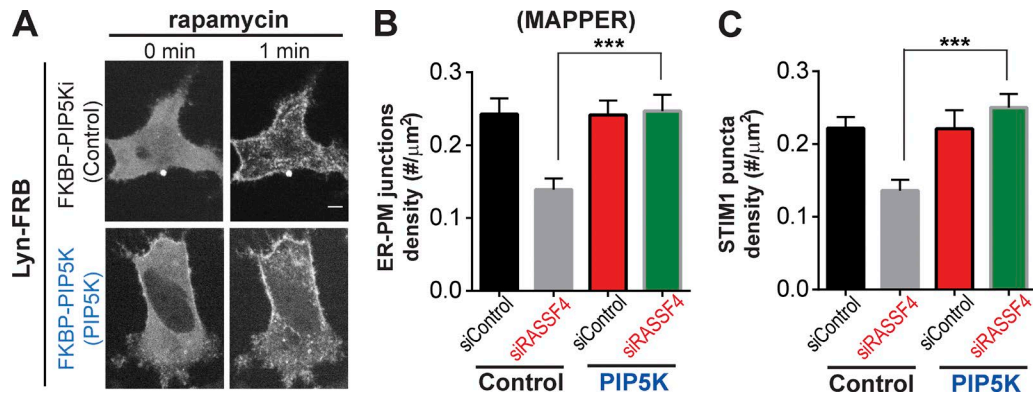

Figure S4. **Reconstitution of ER-PM junctions and STIM1 translocation in RASSF4-knockdown cells by targeting of PIP5K to the PM.** (A) GFP-FKBP-PIP5K or GFP-FKBP-PIP5Ki (the kinase-dead mutant) translocation to the PM induced by 5  $\mu\text{M}$  rapamycin and monitored by confocal microscopy in HeLa cells coexpressing Lyn-FRB. Bar, 5  $\mu\text{m}$ . (B) The density of MAPPER puncta in HeLa cells treated with the indicated siRNA and expressing MAPPER, mCherry-KRAS-tail, Lyn-FRB, and either CFP-FRBP-PIP5K or CFP-FRBP-PIP5Ki. More than 30 cells for each condition across three independent experiments were evaluated. Means  $\pm$  SEM are plotted. (C) The density of STIM1 puncta in HeLa cells treated with the indicated siRNA and expressing mCherry-STIM1, Lyn-FRB, and either CFP-FRBP-PIP5K or CFP-FRBP-PIP5Ki. Cells were stimulated with 1  $\mu\text{M}$  TG for 4 min. More than 20 cells for each condition across two independent experiments were evaluated. Means  $\pm$  SEM are plotted. (B and C) Cells were treated with 5  $\mu\text{M}$  rapamycin for 10 min after the transfection and before the experiments. \*\*\*,  $P < 0.001$ .

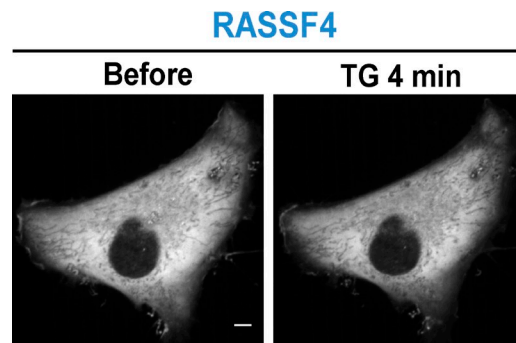

Figure S5. **RASSF4-YFP is diffusely distributed in the cytoplasm of HeLa cells.** Confocal images of a HeLa cell transfected with RASSF4-YFP. 1  $\mu\text{M}$  TG was used for stimulation. Bar, 5  $\mu\text{m}$ .

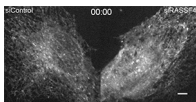

Video 1. **RASSF4 regulates STIM1 translocation to ER-PM junctions during SOCE.** HeLa cells cotransfected with mCherry-STIM1 and either siControl or siRASSF4 were imaged by confocal microscopy. 1  $\mu\text{M}$  TG was used for stimulation. The images were taken every 10 s. The playback rate is five frames per second. Bar, 5  $\mu\text{m}$ .

**Table S1 is available as an Excel file and shows oligonucleotides used in this study.**
